# Supplementary material for: High-κ Dielectric on ReS2: In-Situ Thermal Versus Plasma-Enhanced Atomic Layer Deposition of Al2O3
Source: PubMed Central journal article supplement (PMC6479988; doi:10.3390/ma12071056), 2019-03-30
Supplement: materials-12-01056-s001.pdf [file materials-12-01056-s001.pdf]

# Supplementary Materials: High- $\kappa$ Dielectric on ReS<sub>2</sub>: In-situ Thermal Versus Plasma-Enhanced Atomic Layer Deposition of Al<sub>2</sub>O<sub>3</sub>

Ava Khosravi <sup>1</sup>, Rafik Addou <sup>1,2</sup>, Massimo Catalano <sup>1,3</sup>, Jiyoung Kim <sup>1</sup> and Robert M. Wallace <sup>1,\*</sup>

## 1. C 1s, O 1s, Re 4f, and S 2p Core Level Spectra of Initial ReS<sub>2</sub> and Subsequent Annealing

Figure S1 shows the C 1s, O 1s, Re 4f, and S 2p core levels obtained from the ReS<sub>2</sub> sample after exfoliation and subsequent annealing. It is noted from Figure S1a that the C 1s core level is convoluted with a loss feature of the Re 4d<sub>5/2</sub> (261.7 eV) and Re 4d<sub>3/2</sub> (275.5 eV). This loss feature has been seen in clean Re XPS spectra. Annealing the sample at 250 °C in UHV environment for one hour reduced the intensity of the C 1s signal below the XPS detection limit and also reduced adventitious oxygen chemical states; however, a small concentration (7 at.%) of oxygen remains on the surface (Figure S1b). The O 1s and C 1s core levels were detected from the initial surface of the ReS<sub>2</sub> sample likely originating from the environment after the ex-situ exfoliation process. Figure S1c,d shows Re 4f and S 2p core level spectra before and after annealing. No additional chemical states were detected in Re 4f and S 2p core level spectra after annealing revealing clearly that surface chemistry has not changed after annealing.

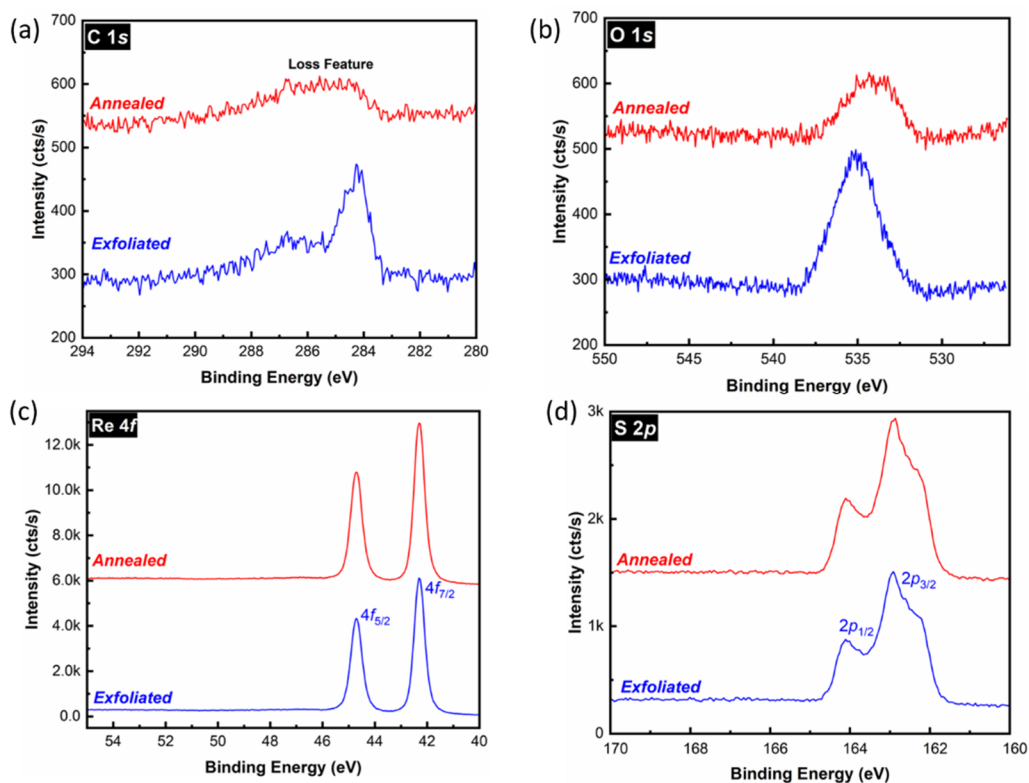

**Figure S1.** (a) C 1s, (b) O 1s, (c) Re 4f, and (d) S 2p core level spectra of initial ReS<sub>2</sub> and subsequent annealing for 1 h at 250 °C in UHV environment.

## 2. In-Situ Half-Cycle ALD/PEALD Process

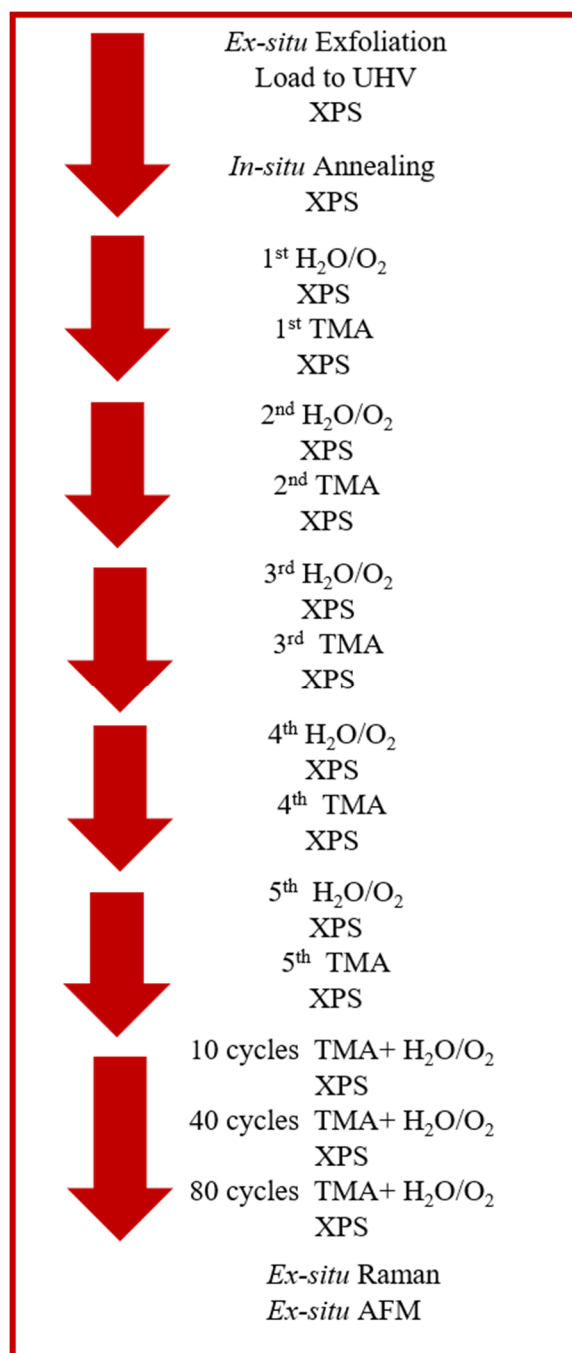

**Figure S2.** Half-cycle ALD/PEALD of Al<sub>2</sub>O<sub>3</sub> on ReS<sub>2</sub>.

### 3. Wider XPS Region of Al 2p

Figure S2 shows the Al 2p core level XPS spectrum recorded after 10 ALD cycles of Al<sub>2</sub>O<sub>3</sub>. This region is convoluted with a loss feature of Re 4f at 68 eV.

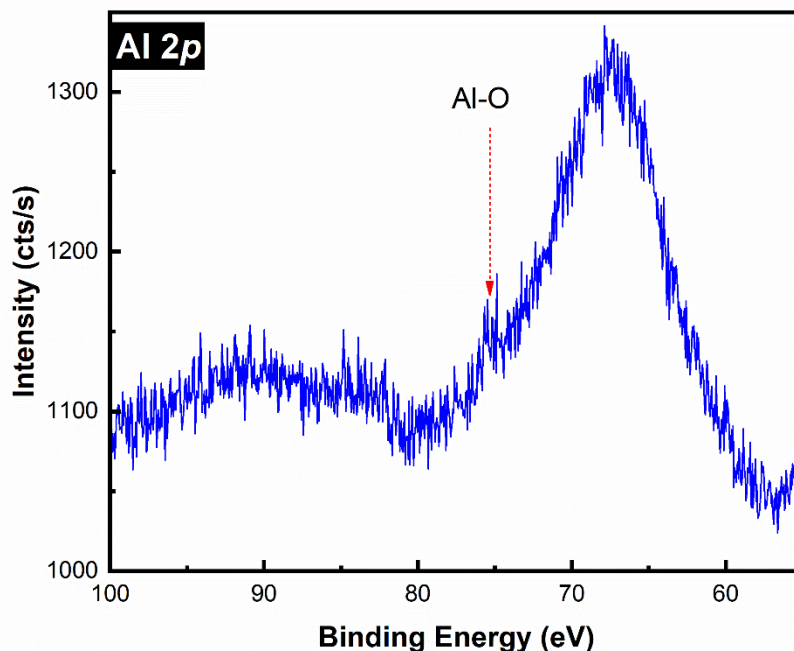

**Figure S3.** Al 2p core level spectrum acquired after 10 cycles ALD of ReS<sub>2</sub>.

#### 4. XPS-Calculated Thickness

The XPS-estimated Al<sub>2</sub>O<sub>3</sub> thickness is calculated based on the attenuation of the substrate S 2p integrated intensity. The effective attenuation length (EAL)  $\lambda$  was calculated using the NIST electron EAL database, version 1.3, where  $\lambda = 2.4$  nm for an electron travelling through amorphous Al<sub>2</sub>O<sub>3</sub>. The signal attenuation is calculated from:

$$I_s = I_s^0 e^{(-t/\lambda \cos \theta)}$$

In this equation  $I_s$  is the attenuated electron signal,  $I_s^0$  is the non-attenuated electron signal,  $t$  is the electron depth,  $\lambda$  is the inelastic mean free path, and  $\theta$  is the XPS take-off angle (45°).

#### 5. O 1s and C 1s Core Level Spectra Comparison

Figure S4 shows the C 1s and O 1s core level spectra after UV-Ozone treatment and after first O<sub>2</sub> pulse of PEALD process. After the first O<sub>2</sub> pulse in PEALD chamber, the C–O in both O 1s and C 1s core level spectra is significantly higher than that of UV-Ozone treated. Figure S4a demonstrates the additional chemical state at lower binding energy relates to the newly formed S–O bond. The intensity of S–O bonds created by UV-Ozone treatment is significantly higher than the first O<sub>2</sub> plasma pulse in PEALD process.

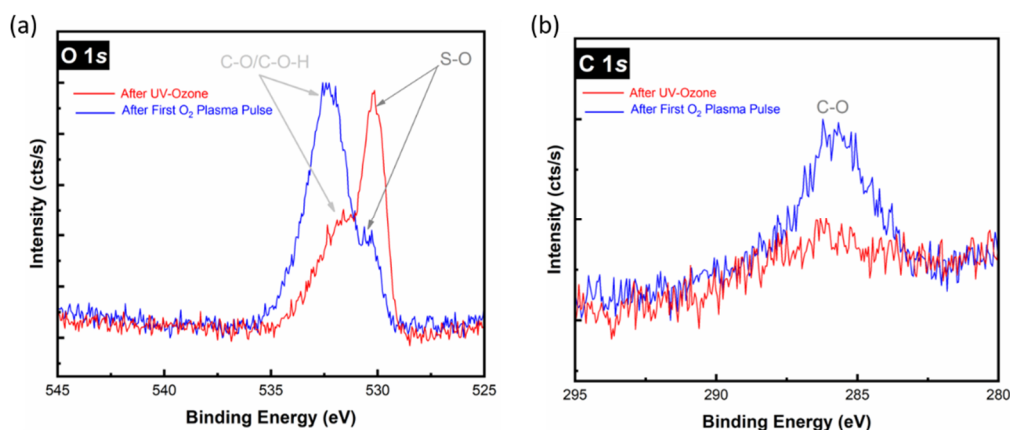

**Figure S4.** O 1s and C 1s core level spectra after UV-Ozone treatment and after first O<sub>2</sub> pulse in PEALD process.

## 6. Re 4f and S 2p Core Level Spectra after Long Time Under X-Ray Exposure and Being in UHV Environment

To monitor the changes on the ReS<sub>2</sub> surface chemistry under a prolonged time of X-ray exposure and UHV environment, as-exfoliated ReS<sub>2</sub> sample was exposed to X-rays for 3 h. All XPS scans were recorded in the exact same spot. Figure S5 shows the Re 4f and S 2p XPS core levels recorded on the as-exfoliated surface and following the X-rays exposure. XPS of the ReS<sub>2</sub> sample does not detect an additional chemical state or any changes on the surface chemistry after 3 h of X-rays exposure. The sample is then left in the UHV environment for 18 hours and a subsequent XPS was recorded on the same spot as shown in Figure S5a,b. Same as the prolonged X-ray exposure, no changes are detected on the surface chemistry of the sample. The prolonged X-ray exposure and UHV conditions occurred during the half-cycle study do not change the surface chemistry of ReS<sub>2</sub> sample. Our ex-situ Raman spectroscopy also confirms that the ReS<sub>2</sub> stays intact following all processing and acquisition conditions, as well as other half-cycle studies reported on different TMD surfaces. [1] Normalized spectra of Re 4f and S 2p core levels from as-exfoliated ReS<sub>2</sub> sample, after X-ray exposure, and after 18h in UHV are shown in Figure S5c,d.

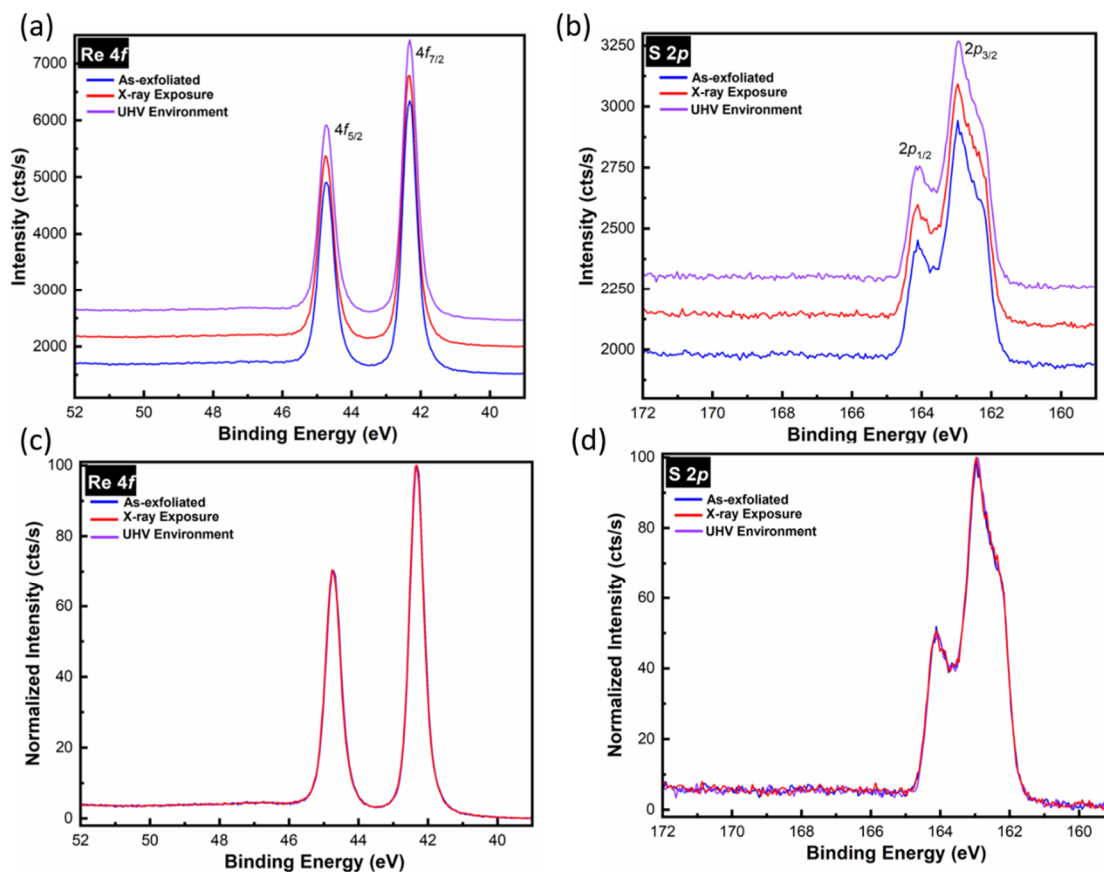

**Figure S5.** (a) Re 4f and (b) S 2p core level spectra from as-exfoliated ReS<sub>2</sub> (blue), after 3 hours X-ray exposure (Red), and after 18 hours in UHV environment (Purple). (c) Re 4f and (d) S 2p core level spectra with normalized intensity from as-exfoliated ReS<sub>2</sub> sample, after X-ray exposure, and after 18h in UHV.

## References

1. McDonnell, S.; Brennan, B.; Azcatl, A.; Lu, N.; Dong, H.; Buie, C.; Kim, J.; Hinkle, C.L.; Kim, M. J.; Wallace, R.M. HfO<sub>2</sub> on MoS<sub>2</sub> by Atomic Layer Deposition: Adsorption Mechanisms and Thickness Scalability. *ACS Nano* **2013**, *7*, 10354.

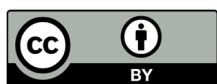

© 2019 by the authors. Submitted for possible open access publication under the terms and conditions of the Creative Commons Attribution (CC BY) license (<http://creativecommons.org/licenses/by/4.0/>).
